# Supplementary material for: Neural activation associated with outgroup helping in adolescent rats
Source: PubMed Central journal article supplement (PMC9160754; doi:10.1016/j.isci.2022.104412), 2022-05-16
Supplement: mmc1.pdf [file mmc1.pdf]

iScience, Volume 25

## **Supplemental information**

### **Neural activation associated with outgroup**

### **helping in adolescent rats**

**Jocelyn M. Breton, Jordan S. Eisner, Vaidehi S. Gandhi, Natalie Musick, Aileen Zhang, Kimberly L.P. Long, Olga S. Perloff, Kelsey Y. Hu, Chau M. Pham, Pooja Lalchandani, Matthew K. Barraza, Ben Kantor, Daniela Kaufer, and Inbal Ben-Ami Bartal**

Fig. S1. Individual c-Fos expression for all regions and conditions, related to Fig. 3

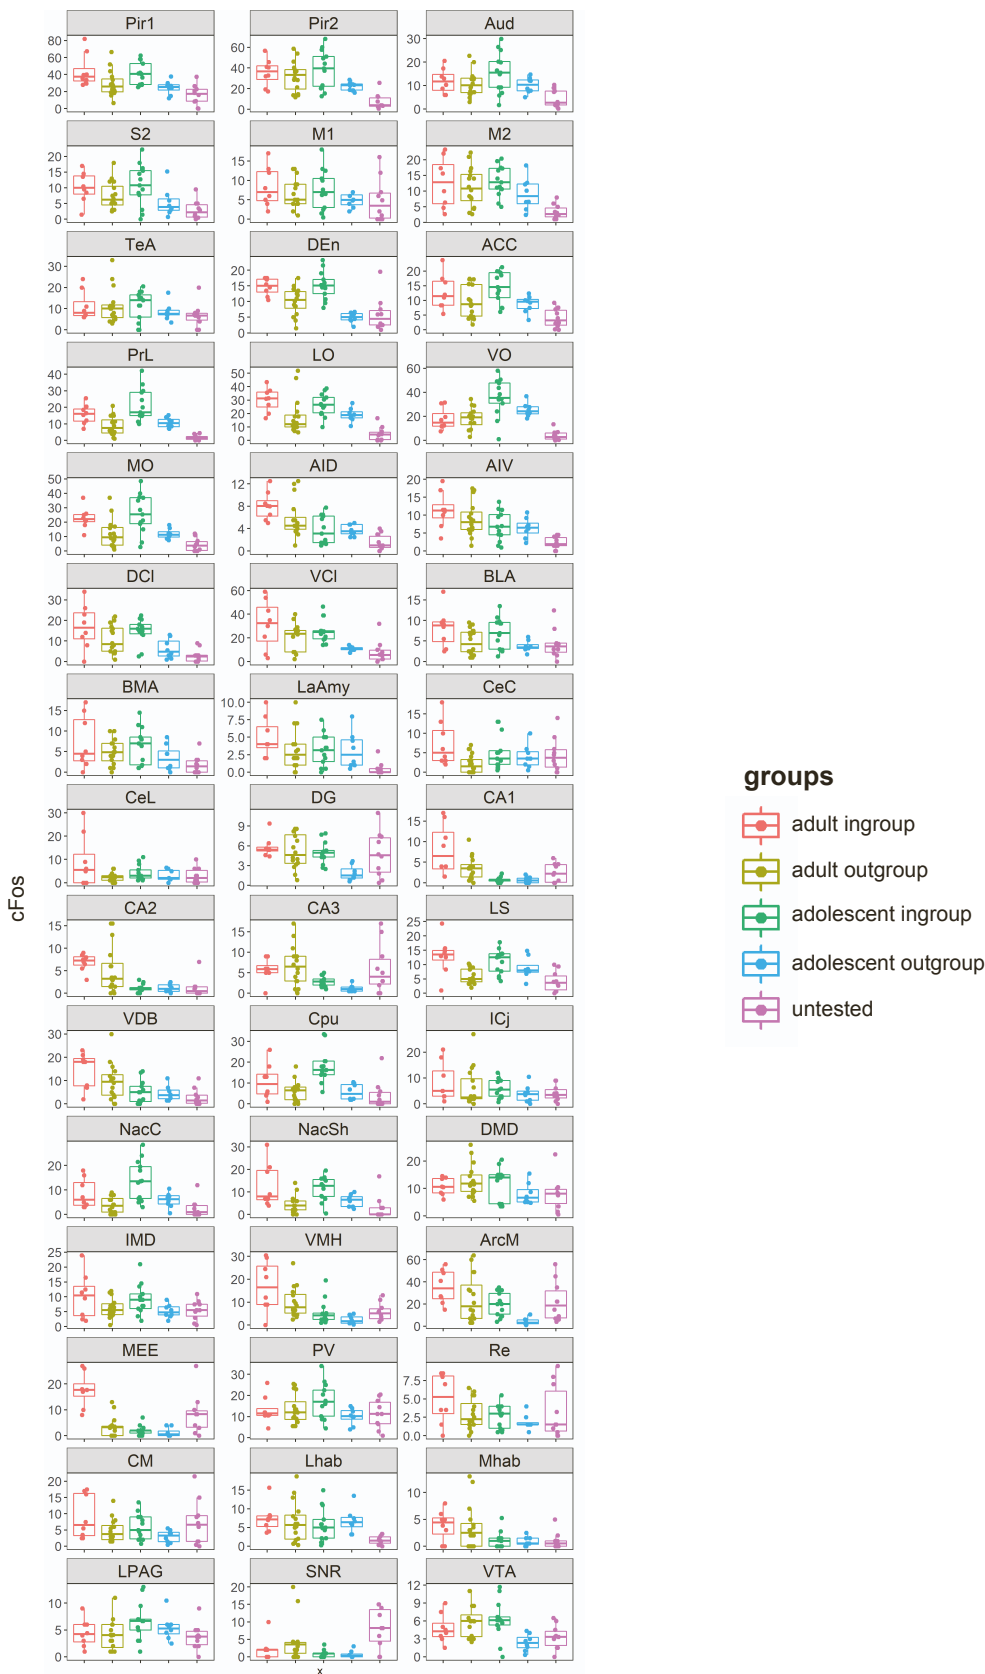

Fig S1. Individual c-Fos expression for all regions and conditions. Box plots of c-Fos data in all brain regions across all test groups. Center bars mark the median. Lower and upper edges correspond to the 25th and 75th percentiles. Descriptions of the brain region abbreviations can be found in Table S1. Data points are jittered along the x-axis to avoid overlaps. X: experimental groups; Y: c-Fos<sup>+</sup> cell numbers.

**Fig. S2. Central hubs for adolescent openers and non-openers, related to figure 5**

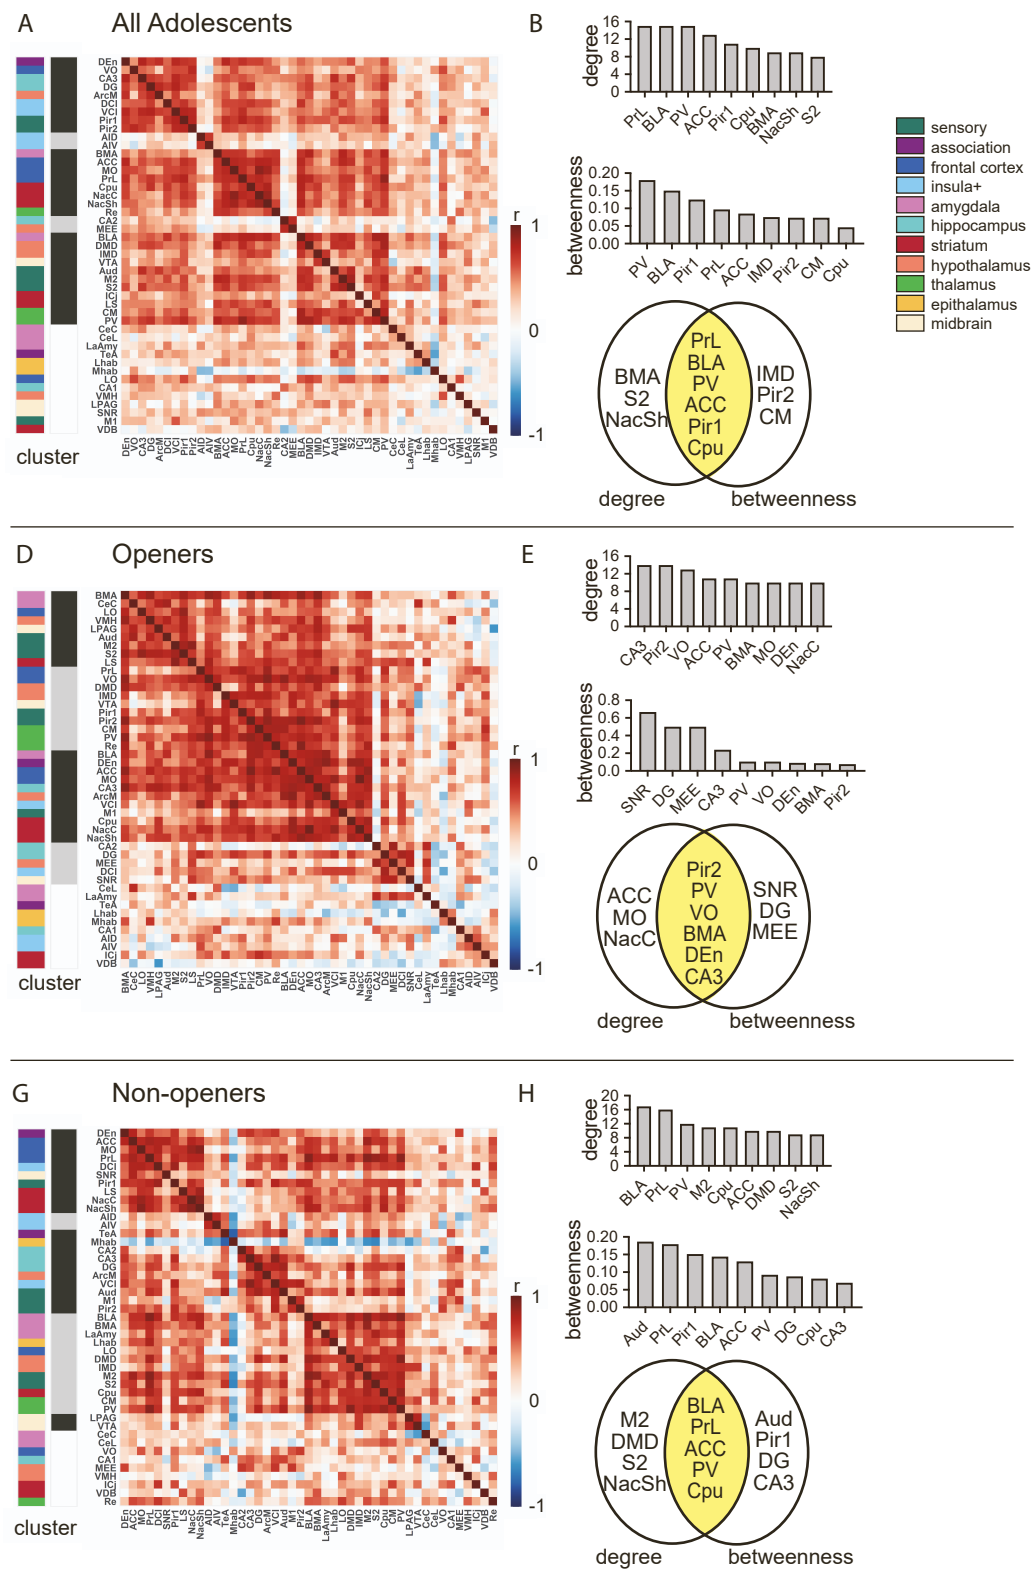

**Fig S2.** Pearson's correlations across all brain regions in adolescent rats tested in the HBT. Correlation matrices (A,C,E) and central hubs (B,D,F) for (A-B): All adolescent rats, (C-D): Adolescent openers, and (E-F) Adolescent non-openers. Colored bars on left indicate general brain region of each row (for color legend see Fig. 3) The grayscale bar denotes clusters determined via Louvain algorithm. The regions rated as top 20% for degree and connectivity were combined to identify central hubs.

**Table S1.** 2- way ANOVA results. Related to Figures 3-5

| <b>Brain Region</b>         | <b>Group Identity</b>                   | <b>Age</b>                              | <b>Interaction</b>  |
|-----------------------------|-----------------------------------------|-----------------------------------------|---------------------|
| Pir1<br>Piriform c.         | F (1, 40) = 11.63<br><b>** q=0.0052</b> | F (1, 40) = 0.8078                      | F (1, 40) = 0.01069 |
| Pir2<br>Piriform c.         | F (1, 41) = 1.946                       | F (1, 41) = 0.5543                      | F (1, 41) = 5.036   |
| Aud<br>Auditory c.          | F (1, 39) = 2.566                       | F (1, 39) = 0.4879                      | F (1, 39) = 1.104   |
| S2<br>Somatosensory c.      | F (1, 39) = 5.648                       | F (1, 39) = 0.2088                      | F (1, 39) = 0.6472  |
| M1<br>Motor c.              | F (1, 38) = 2.608                       | F (1, 38) = 0.7417                      | F (1, 38) = 0.1015  |
| M2<br>Motor c.              | F (1, 42) = 2.593                       | F (1, 42) = 0.3220                      | F (1, 42) = 0.6461  |
| TeA<br>Temporal assoc. c.   | F (1, 38) = 0.4533                      | F (1, 38) = 0.3985                      | F (1, 38) = 0.5176  |
| Den<br>Endopiriform         | F (1, 40) = 37.94<br><b>** q=0.0017</b> | F (1, 40) = 3.677                       | F (1, 40) = 5.219   |
| ACC<br>Ant. Cingulate c.    | F (1, 41) = 8.533                       | F (1, 41) = 0.03591                     | F (1, 41) = 0.8141  |
| PrL<br>Prelimbic c.         | F (1, 40) = 16.43<br><b>** q=0.0017</b> | F (1, 40) = 2.943                       | F (1, 40) = 0.8072  |
| LO<br>Lat. Orbitofrontal c. | F (1, 39) = 9.985<br><b>** q=0.0086</b> | F (1, 39) = 0.3394                      | F (1, 39) = 0.2903  |
| VO<br>Ventral orbitofrontal | F (1, 40) = 2.031                       | F (1, 40) = 13.20<br><b>**q=0.0031</b>  | F (1, 40) = 2.549   |
| MO<br>Med. Orbitofrontal    | F (1, 40) = 15.36<br><b>** q=0.0021</b> | F (1, 40) = 0.2487                      | F (1, 40) = 0.2257  |
| AID<br>Dorsal ant. Insula   | F (1, 40) = 1.922                       | F (1, 40) = 13.55<br><b>** q=0.0031</b> | F (1, 40) = 1.732   |
| AIV<br>Ventral ant. insual  | F (1, 41) = 1.470                       | F (1, 41) = 5.303                       | F (1, 41) = 0.7340  |
| DCI<br>Dorsal claustrum     | F (1, 41) = 12.14<br><b>** q=0.0046</b> | F (1, 41) = 1.939                       | F (1, 41) = 0.4127  |
| VCI<br>Ventral claustrum    | F (1, 41) = 12.52<br><b>** q=0.0043</b> | F (1, 41) = 3.991                       | F (1, 41) = 0.2145  |

|                                      |                                         |                                          |                        |
|--------------------------------------|-----------------------------------------|------------------------------------------|------------------------|
| BLA<br>Basolateral amygdala          | F (1, 41) = 8.897                       | F (1, 41) = 0.8785                       | F (1, 41) = 0.03535    |
| BMA<br>Basomedial amygdala           | F (1, 39) = 3.372                       | F (1, 39) = 0.5021                       | F (1, 39) = 0.006811   |
| LaAmy<br>Lateral amygdala            | F (1, 40) = 0.7826                      | F (1, 40) = 0.9492                       | F (1, 40) = 1.604      |
| CeC<br>Central amygdala              | F (1, 40) = 6.181                       | F (1, 40) = 0.008356                     | F (1, 40) = 3.237      |
| CeL<br>Central amygdala              | F (1, 39) = 5.056                       | F (1, 39) = 1.232                        | F (1, 39) = 3.135      |
| DG<br>Dentate gyrus                  | F (1, 40) = 8.677                       | F (1, 40) = 10.97<br><b>** q=0.0071</b>  | F (1, 40) = 3.633      |
| CA1<br>hippocampus                   | F (1, 39) = 4.987                       | F (1, 39) = 25.58<br><b>*** q=0.0009</b> | F (1, 39) = 4.846      |
| CA2<br>Hippocampus                   | F (1, 40) = 0.6554                      | F (1, 40) = 20.93<br><b>*** q=0.0009</b> | F (1, 40) = 0.6074     |
| CA3<br>hippocampus                   | F (1, 38) = 0.09875                     | F (1, 38) = 14.97<br><b>** q=0.0028</b>  | F (1, 38) = 1.473      |
| LS<br>Lateral septum                 | F (1, 39) = 11.24<br><b>** q=0.0056</b> | F (1, 39) = 0.1116                       | F (1, 39) = 3.227      |
| VDB<br>Vent. Diag. band of broca     | F (1, 40) = 1.589                       | F (1, 40) = 13.02<br><b>** q=0.0031</b>  | F (1, 40) = 1.414      |
| Cpu<br>Caudate putamen               | F (1, 40) = 17.59<br><b>** q=0.0017</b> | F (1, 40) = 2.950                        | F (1, 40) = 3.499      |
| ICj<br>Islands of callaja            | F (1, 39) = 1.060                       | F (1, 39) = 1.727                        | F (1, 39) = 1.178e-006 |
| NAcC<br>Nuc. accumbens core          | F (1, 40) = 12.52<br><b>** q=0.0043</b> | F (1, 40) = 4.243                        | F (1, 40) = 0.8062     |
| NAcSh<br>Nuc. accumbens shell        | F (1, 40) = 14.73<br><b>** q=0.0023</b> | F (1, 40) = 0.001683                     | F (1, 40) = 0.7023     |
| DMD<br>Dorsomed. Hypothalamus        | F (1, 40) = 0.8251                      | F (1, 40) = 1.978                        | F (1, 40) = 1.890      |
| IMD<br>Int. mediodorsal hypothalamus | F (1, 41) = 7.645                       | F (1, 41) = 0.5442                       | F (1, 41) = 0.002939   |
| VMH<br>Ventromedial hypothalamus     | F (1, 41) = 6.212                       | F (1, 41) = 20.74<br><b>*** q=0.0009</b> | F (1, 41) = 0.7902     |

|                                     |                                         |                                          |                      |
|-------------------------------------|-----------------------------------------|------------------------------------------|----------------------|
| ArcM<br>Med. Arcuate hypothalamus   | F (1, 39) = 7.110                       | F (1, 39) = 13.41<br><b>** q=0.0031</b>  | F (1, 39) = 0.2829   |
| MEE<br>Med. eminence                | F (1, 31) = 18.03<br><b>** q=0.0017</b> | F (1, 31) = 31.75<br><b>*** q=0.0009</b> | F (1, 31) = 14.40    |
| PV<br>Paraventricular thalamic nu.  | F (1, 39) = 2.405                       | F (1, 39) = 0.03630                      | F (1, 39) = 2.802    |
| Re<br>Reunions                      | F (1, 40) = 5.066                       | F (1, 40) = 6.502                        | F (1, 40) = 0.7999   |
| CM<br>Cent. Med thalamus            | F (1, 41) = 7.399                       | F (1, 41) = 3.557                        | F (1, 41) = 0.1994   |
| Lhab<br>Lateral habenula            | F (1, 39) =<br>0.002036                 | F (1, 39) = 0.1812                       | F (1, 39) = 0.4681   |
| Mhab<br>Medial habenula             | F (1, 38) = 0.08974                     | F (1, 38) = 7.920                        | F (1, 38) = 0.001485 |
| LPAG<br>Lateral periaqueductal gray | F (1, 35) = 0.5708                      | F (1, 35) = 2.982                        | F (1, 35) = 0.1695   |
| SNR<br>Substantia nigra             | F (1, 36) = 0.5972                      | F (1, 36) = 3.947                        | F (1, 36) = 0.8727   |
| VTA<br>Ventral tegmental area       | F (1, 36) = 1.913                       | F (1, 36) = 1.437                        | F (1, 36) = 7.306    |

**Table S1.** 2- way ANOVA results. Main effects of group identity, age, and/or interaction between the two. The F statistic is shown for each main effect. Multiple comparisons were corrected for using a False Discovery Rate (FDR) approach. Statistically significant discoveries and their FDR adjusted p-values (q-values) are shown in bold. \* $q < 0.05$ , \*\* $q < 0.01$ , \*\*\* $q < 0.001$ .
